# Supplementary material
Source: PubMed Central journal article supplement (PMC4851312)
Supplement: celldisc20153-s1.pdf [file celldisc20153-s1.pdf]

**Table S1.** Mass spectrometric analysis of JMJ14-3×Flag affinity purification. The percentage of JMJ14 (% JMJ14) column indicates the approximate stoichiometry of each co-purifying protein as a function of the normalized spectral abundance factor (NSAF). NAC transcription proteins are underlined.

| <b>Protein</b>                                     | <b>AGI code</b>  | <b>Spectra</b> | <b>Unique Peptides</b> | <b>% Coverage</b> | <b>NSAF<sub>e5</sub></b> | <b>% JMJ14</b> |
|----------------------------------------------------|------------------|----------------|------------------------|-------------------|--------------------------|----------------|
| JMJ14                                              | AT4G20400        | 717            | 42                     | 33.1              | 7200.925                 | 100            |
| <u>NAC052</u>                                      | <u>AT3G10490</u> | <u>44</u>      | <u>9</u>               | <u>26.2</u>       | <u>878.896</u>           | 12.21          |
| H2A                                                | AT4G13570        | 9              | 2                      | 7.6               | 610.989                  | 8.48           |
|                                                    | AT1G52740        |                |                        |                   |                          |                |
|                                                    | AT2G38810        |                |                        |                   |                          |                |
|                                                    | AT3G54560        |                |                        |                   |                          |                |
| <u>NAC050</u>                                      | <u>AT3G10480</u> | <u>28</u>      | <u>7</u>               | <u>19.7</u>       | <u>564.303</u>           | <u>7.84</u>    |
| RPN12                                              | AT1G64520        | 5              | 3                      | 12                | 168.702                  | 2.34           |
| Putative calcium-binding protein                   | AT1G18210        | 3              | 2                      | 17.6              | 158.977                  | 2.21           |
| YbaB family COG0718                                | AT2G24020        | 3              | 2                      | 17                | 148.495                  | 2.06           |
| RPN3                                               | AT1G75990        | 8              | 4                      | 11.7              | 147.987                  | 2.05           |
| RPL21                                              | AT1G35680        | 3              | 2                      | 6.4               | 122.846                  | 1.71           |
| Putative DNA binding protein                       | AT1G49950        | 4              | 2                      | 10.7              | 120.116                  | 1.67           |
| THF1                                               | AT2G20890        | 4              | 3                      | 11                | 120.116                  | 1.67           |
| ADP-ribosylation factor                            | AT2G47170        | 2              | 2                      | 12.6              | 99.051                   | 1.38           |
|                                                    | AT1G23490        |                |                        |                   |                          |                |
|                                                    | AT1G70490        |                |                        |                   |                          |                |
|                                                    | AT3G62290        |                |                        |                   |                          |                |
|                                                    | AT1G10630        |                |                        |                   |                          |                |
|                                                    | AT5G14670        |                |                        |                   |                          |                |
| AT1G70490                                          |                  |                |                        |                   |                          |                |
| Putative NAD <sup>+</sup> isocitrate dehydrogenase | At5g03290        | 4              | 2                      | 6.7               | 96.35                    | 1.34           |
| 3-oxoacyl-(acyl-carrier protein) reductase         | AT1G24360        | 3              | 2                      | 9.7               | 84.721                   | 1.18           |
| RPB36a                                             | AT2G15430        | 3              | 2                      | 10.3              | 84.721                   | 1.18           |

|                                                          |           |   |   |      |        |      |
|----------------------------------------------------------|-----------|---|---|------|--------|------|
| ATP synthase gamma chain                                 | AT2G33040 | 3 | 3 | 10.8 | 83.157 | 1.15 |
| PRLI-interacting factor L                                | AT1G80480 | 4 | 2 | 5.9  | 81.159 | 1.13 |
| Putative NAD <sup>+</sup> isocitrate dehydrogenase       | AT3G09810 | 3 | 2 | 6.7  | 72.262 | 1    |
| RPN9                                                     | AT4G19006 | 3 | 2 | 5.7  | 70.016 | 0.97 |
| thylakoid lumenal protein-related                        | AT1G12250 | 2 | 2 | 12.1 | 64.348 | 0.89 |
| NTF2 family protein                                      | AT5G43960 | 3 | 2 | 7.7  | 64.271 | 0.89 |
| Putative cyclohydrolase                                  | AT3G12290 | 2 | 2 | 10   | 60.259 | 0.84 |
| RPN1B                                                    | AT4G28470 | 5 | 5 | 5.9  | 57.971 | 0.81 |
| DNAJ heat shock family protein                           | AT3G62600 | 2 | 2 | 9.8  | 52.073 | 0.72 |
| ATIMPALPHA3                                              | AT4G02150 | 3 | 3 | 7.7  | 50.897 | 0.71 |
| dihydrolipoamide dehydrogenase 2                         | AT4G16155 | 3 | 2 | 4.1  | 47.665 | 0.66 |
| CER2                                                     | AT4G24510 | 2 | 2 | 6.2  | 42.797 | 0.59 |
| putative lactase                                         | AT2G28470 | 4 | 2 | 4.5  | 42.294 | 0.58 |
| clathrin adaptor complexes medium subunit family protein | AT1G60780 | 2 | 2 | 7.9  | 42.097 | 0.58 |
| ERF1-1                                                   | AT5G47880 | 2 | 2 | 5.5  | 41.324 | 0.57 |
| EMB3003                                                  | AT1G34430 | 2 | 2 | 7.3  | 38.747 | 0.54 |
| F-box family protein                                     | AT5G22610 | 2 | 2 | 1.9  | 38.172 | 0.53 |
| ASN3                                                     | AT5G10240 | 2 | 2 | 4.7  | 31.199 | 0.43 |
| ASN2                                                     | AT5G65010 | 2 | 2 | 4.7  | 31.145 | 0.43 |
| glycosyl transferase family 20 protein                   | AT1G06410 | 2 | 2 | 3.1  | 21.172 | 0.29 |
