# Supplementary material
Source: PubMed Central journal article supplement (PMC4851312)
Supplement: celldisc20153-s2.pdf [file celldisc20153-s2.pdf]

**Table S2.** The primer list.

| <b>Primers for plasmids construction</b>              |                    |                                            |
|-------------------------------------------------------|--------------------|--------------------------------------------|
| <b>Plasmid</b>                                        | <b>Primer code</b> | <b>Primer sequence</b>                     |
| P <sub>JMJ14</sub> ::JMJ14-HA (XF2080)                | CX5033             | <u>CACCTTGACATGGTATAAACATTGG</u>           |
|                                                       | CX3599             | AGGACTTATCTCCATCTTATCA                     |
| P <sub>JMJ14</sub> ::JMJ14 $\Delta$ FYR-HA (XF2082)   | CX5033             | <u>CACCTTGACATGGTATAAACATTGG</u>           |
|                                                       | CX7385             | TCCACACCAAGTTTACATCC                       |
| P <sub>35S</sub> ::NAC050-CFP-HA (XF1685)             | CX8188             | <u>CACCATGGGTCGCGAATCTCTGGCTG</u>          |
|                                                       | CX8189             | ACTAGCTTGTCCTACTGGCGTTC                    |
| P <sub>35S</sub> ::NAC052-CFP-HA (XF1687)             | CX8191             | <u>CACCATGGGTCGCGAATCTGTGGCTG</u>          |
|                                                       | CX8194             | TTGTCCATTAGCATTGTTCTTCTTG                  |
| P <sub>35S</sub> ::JMJ14 $\Delta$ FYR-YFP-HA (XF2087) | CX3598             | <u>CACCATGGATCAGCTTGCATCTCTAG</u>          |
|                                                       | CX7385             | TCCACACCAAGTTTACATCC                       |
| P <sub>JMJ14</sub> ::JMJ14-GFP-GUS-UTR (XF2084)       | CX9280             | <u>AAGGTACCTTGACATGGTATAAACATTGG</u>       |
|                                                       | CX9281             | <u>AAGTCGACAGGACTTATCTCCATCTTATCA</u>      |
|                                                       | CX9282             | <u>AACCATGGGGAGGAGCAAGCAGATAAACAC</u>      |
|                                                       | CX9283             | <u>AACCATGGGCAAGCACTGTCTCGAATTTGG</u>      |
| P <sub>NAC050</sub> ::NAC050-GFP-GUS-UTR (XF2085)     | CX9272             | <u>AAGAATTCGCAGGTCGAGAGCGAGAGAT</u>        |
|                                                       | CX9273             | <u>AAGGATCCACTAGCTTGTCCACTGGCGTTC</u>      |
|                                                       | CX9274             | <u>AACCATGGACCACCGCAACATCTCTCCA</u>        |
|                                                       | CX9275             | <u>AACCATGGCAGGTTCCGTATAATAGGACG</u>       |
| P <sub>NAC052</sub> ::NAC052-GFP-GUS-UTR (XF2086)     | CX9276             | <u>AAGAATTCAGAAGATGAGCGTCCTCCTTCT</u>      |
|                                                       | CX9277             | <u>AAGGATCCTTGTCCATTAGCATTGTTCTTCTTG</u>   |
|                                                       | CX9278             | <u>AACCATGGAGGCTCTAAAAACATCTCTCCAGG</u>    |
|                                                       | CX9279             | <u>AACCATGGCTGTGACTGTTTTCGGGTGAC</u>       |
| P <sub>NAC050</sub> ::NAC050-HA-UTR (XF2088)          | CX9272             | <u>AAGAATTCGCAGGTCGAGAGCGAGAGAT</u>        |
|                                                       | CX9273             | <u>AAGGATCCACTAGCTTGTCCACTGGCGTTC</u>      |
|                                                       | HX2078             | <u>AACTGCAGTGAACCACCGCAACATCTCTCCA</u>     |
|                                                       | HX2079             | <u>AAAAGCTTCTGCAGCAGGTTCCGTATAATAGGACG</u> |
| P <sub>NAC052</sub> ::NAC052-HA-UTR (XF2089)          | CX9276             | <u>AAGAATTCAGAAGATGAGCGTCCTCCTTCT</u>      |
|                                                       | CX9277             | <u>AAGGATCCTTGTCCATTAGCATTGTTCTTCTTG</u>   |
|                                                       | HX2080             | <u>AACTGCAGTGAAGGCTCTAAAAACATCTCTCCAGG</u> |
|                                                       | HX2081             | <u>AAAAGCTTCTGCAGCTGTGACTGTTTTCGGGTGAC</u> |
| JMJ14-pGBKT7 (XF1971)                                 | CX5024             | <u>AACCCGGGATGGATCAGCTTGCATCTCTAGC</u>     |
|                                                       | CX5025             | <u>AACTGCAGTTAAGGACTTATCTCCATCTTA</u>      |
| NAC050-pGADT7 (XF1974)                                | CX8980             | <u>AAGAATTCATGGGTCGCGAATCTCTGGCTG</u>      |
|                                                       | CX8981             | <u>AAGGATCCTTAAGTAGCTTGTCCACTGGCG</u>      |
| NAC052-pGADT7 (XF1976)                                | CX8984             | <u>AAGAATTCATGGGTCGCGAATCTGTGGCTG</u>      |
|                                                       | CX8985             | <u>AAGGATCCTTATTGTCCATTAGCATTGTTCTTC</u>   |

|                                                         |                    |                                                   |
|---------------------------------------------------------|--------------------|---------------------------------------------------|
| JMj14ΔJmjN-pGBKT7 (XF1977)                              | CX8988             | AACCAAAGGCCTGCAAGCTTCT                            |
|                                                         | CX8989             | GAGAATTCTAAATTTCCCACCCGG                          |
| JMj14ΔJmjC-pGBKT7 (XF1978)                              | CX8990             | TGCTTCACTTATAGGATACCCCGG                          |
|                                                         | CX8991             | CGGCGAAAGAGTTCATTGTCCAC                           |
| JMj14ΔZnF-pGBKT7 (XF1979)                               | CX8992             | CCGTTCTCTCTTATTGTTCGAAATC                         |
|                                                         | CX8993             | CTAGAAGGGGATCTTGATGCCA                            |
| JMj14ΔFYR-pGBKT7 (XF1980)                               | CX8994             | CTCAACAGAGAGACTTAACCTATT                          |
|                                                         | CX8995             | GATGATACAGAGAAAGGAGGGG                            |
| JmjN-pGBKT7 (XF1981)                                    | HX2032             | AACCCGGGAGGCCTTTGGTTGATGACGC                      |
|                                                         | HX2033             | AACTGCAGCTTCAGAGGGCAAGGGGGCC                      |
| JmjC-pGBKT7 (XF1982)                                    | HX2034             | AACCCGGGATAAGTGAAGCAGATCAATACTC                   |
|                                                         | HX2035             | AACTGCAGCTTTCGCCGCTGCTTGCTATAG                    |
| ZnF-pGBKT7 (XF1983)                                     | HX2036             | AACCCGGGAAGAGAGAACGGGAGTGCTTC                     |
|                                                         | HX2037             | AACTGCAGCCCTTCTAGAGCTCTGACCAG                     |
| FYR-pGBKT7 (XF1986)                                     | HX2038             | AACCCGGGGAGCTTTTGAGTTCTGGATCTC                    |
|                                                         | HX2041             | AACTGCAGATCCTTTTCTCCTTCCTTTATTG                   |
| FYRN-pGBKT7 (XF1984)                                    | HX2038             | AACCCGGGGAGCTTTTGAGTTCTGGATCTC                    |
|                                                         | HX2039             | AACTGCAGAAGCCCTGCATCCAGAACCTC                     |
| FYRC-pGBKT7 (XF1985)                                    | HX2040             | AACCCGGGGTCCATTGTTTCAGGGTCTC                      |
|                                                         | HX2041             | AACTGCAGATCCTTTTCTCCTTCCTTTATTG                   |
| NAC050-pMAL-C2-MBP (XF1996)/NAC050-pMAL-C2-GST (XF1995) | HX2046             | <u>TACTTCCAATCCAATGCGATGGGTCGCGAATCTCTGGC</u>     |
|                                                         | CX9579             | <u>TTATCCACTTCCAATGCGCTAACTAGCTTGCCACTGGCGT</u>   |
| NAC052-pMAL-C2-MBP (XF1999)/NAC052-pMAL-C2-GST (XF1998) | HX2047             | <u>TACTTCCAATCCAATGCGATGGGTCGCGAATCTGTGGC</u>     |
|                                                         | CX9581             | <u>TTATCCACTTCCAATGCGCTATTGTCCATTAGCATTGTTCT</u>  |
| FYR-pMAL-C2-GST (XF-2010)                               | HX0406             | <u>TACTTCCAATCCAATGCGGACCAAAATGCTGCAACCAA</u>     |
|                                                         | CX5012             | <u>TTATCCACTTCCAATGCGCTAAGGACTTATCTCCATCTTATC</u> |
| <b>Primers for ChIP-qPCR</b>                            |                    |                                                   |
| <b>Gene</b>                                             | <b>Primer code</b> | <b>Primer sequence</b>                            |
| <i>At1g21290 5'</i>                                     | HX4477             | CGGTATTGGTGTGCATGTTG                              |
|                                                         | HX4478             | TGGCGGAAACTATCATCAGC                              |
| <i>At1g21290 3'</i>                                     | HX4479             | ACGGAGGAATCTTCTGTGC                               |
|                                                         | HX4480             | GAGAAACGAGCTACAGAGGC                              |
| <i>At1g72460 5'</i>                                     | HX4932             | CAAGCCAACGATGGATCGGA                              |
|                                                         | HX4933             | AGGTCTTTTAACGGAGCGACA                             |
| <i>At1g72460 3'</i>                                     | HX4934             | CCCGTCTCAATACGCTGGTT                              |
|                                                         | HX4935             | CCACCATCGGATGAAGCAGA                              |

| <i>At2g32510 5'</i>                   | HX4976             | ACGACACCGTTTGACTCTCTC        |
|---------------------------------------|--------------------|------------------------------|
|                                       | HX4977             | AGGTTACCGCTCAGAGTTC          |
| <i>At2g32510 3'</i>                   | HX4978             | TGTTTCCTTCACACCTCGCTC        |
|                                       | HX4979             | TACTCGGAGAGGATCGGACG         |
| <i>At5g45810 5'</i>                   | HX4598             | CGCACGAAACGCTCAATCTG         |
|                                       | HX4599             | GATCTCGCGTTTGATGTGTGC        |
| <i>At5g45810 3'</i>                   | HX4600             | CACCAGCTTTGGTTGTTGTTGA       |
|                                       | HX4601             | GTTGGCCATTTTCGGAAGACA        |
| <i>Ta3</i>                            | HX4621             | CAGACACTTCACTTTCTTGTTAACC    |
|                                       | HX4622             | CAAGAAAGGTATGGCTGTATTTC      |
| <i>Actin</i>                          | CX5783             | CGTTTCGCTTTCCTTAGTGTTAGCT    |
|                                       | HX4620             | CTCACCTTGAAGAAGAAGAAGATGATAC |
| <b>Primers for RT-qPCR and RT-PCR</b> |                    |                              |
| <b>Gene</b>                           | <b>Primer code</b> | <b>Primer sequence</b>       |
| <i>FT</i> (RT-qPCR)                   | CX5485             | AAAACAAGTAAAACAGAAACAATC     |
|                                       | CX5486             | GCCATAAGTAACCTTTAGAGTG       |
| <i>NAC052</i> (RT-qPCR)               | CX8565             | TCGATATCCAGTGGAGCTGTC        |
|                                       | CX8566             | GAAACCGAGAAAAACGGAAC         |
| <i>At1g21290</i> (RT-qPCR)            | HX4477             | CGGTATTGGTGTGCATGTTG         |
|                                       | HX4478             | TGGCGGAAACTATCATCAGC         |
| <i>UBC</i> (RT-qPCR)                  | CX8290             | TCAAATGGACCGCTCTTATC         |
|                                       | CX8291             | CACAGACTGAAGCGTCCAAG         |
| <i>NAC050</i> (RT-PCR)                | CX8188             | CACCATGGGTCGCGAATCTCTGGCTG   |
|                                       | CX8189             | ACTAGCTTGTCCTACTGGCGTTC      |
| <i>NAC052</i> (RT-PCR)                | CX8191             | CACCATGGGTCGCGAATCTGTGGCTG   |
|                                       | CX8194             | TTGTCCATTAGCATTGTTCTTCTTG    |
| <i>Actin</i> (RT-PCR)                 | CX0415             | CTCAGCACCTTCCAACAGATGTGGA    |
|                                       | CX0416             | CCAAAAAATGAACCAAGGACCAAA     |
