# Supplementary material
Source: PubMed Central journal article supplement (PMC4851312)
Supplement: celldisc20153-s3.pdf [file celldisc20153-s3.pdf]

# Fig. S1

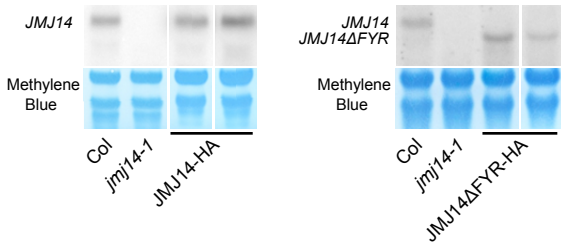

**Fig. S1.** The expression level of *JMJ14* and truncated *JMJ14* with FYR (FYRN + FYRC) domain deletion in different *JMJ14* complementary lines. *JMJ14*-HA and *JMJ14*ΔFYR-HA indicates the  $P_{JMJ14}::JMJ14$ -HA *jmj14-1* and  $P_{JMJ14}::JMJ14$ ΔFYR-HA *jmj14-1* transgenic lines respectively.
