# Supplementary material
Source: PubMed Central journal article supplement (PMC4851312)
Supplement: celldisc20153-s4.pdf [file celldisc20153-s4.pdf]

**Fig. S2**

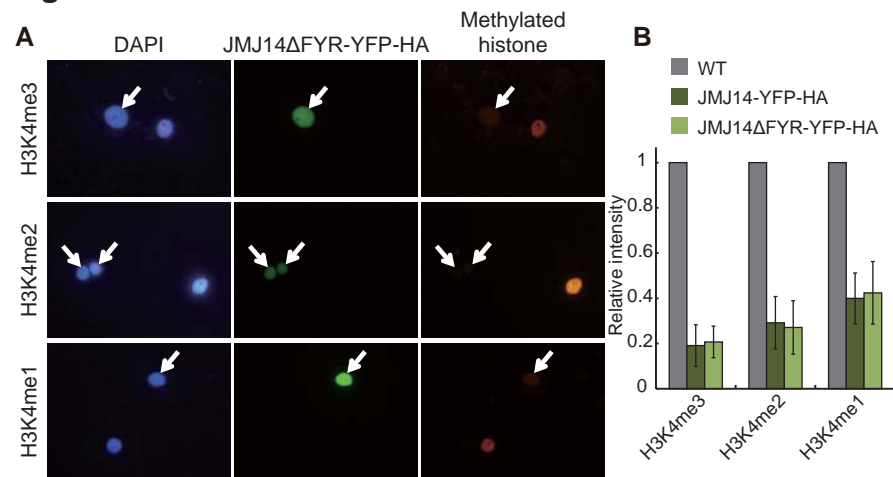

**Fig. S2.** Deletion of FYR (FYRN + FYRC) domain does not influence the demethylase activity of JMJ14. (A) Overexpression of JMJ14 $\Delta$ FYR-YFP-HA reduced H3K4me3, H3K4me2 and H3K4me1. (B) The Statistical analysis of enzymatic activity of JMJ14 $\Delta$ FYR-YFP-HA compared with JMJ14-YFP-HA.
