# Supplementary material
Source: PubMed Central journal article supplement (PMC4851312)
Supplement: celldisc20153-s6.pdf [file celldisc20153-s6.pdf]

## Fig. S4

```
NAC050 1 : MGRESLAVVSSPPSATAPSTAVSATSLAPGFRFHPTDEELVSYLKRKVLGKPVRFDAIG : 60
NAC052 1 : MGRESVAVVTA PPSATAPCTASVATSLAPGFRFHPTDEELVSYLKRKVLGCPVRFDAIG : 60

NAC050 61 : EVDIYKHEPVDLAVFSK LKTRDQEWYFYSALDKKYNGARMNRATNKGYWKATGKDREIR : 120
NAC052 61 : EVDIYKHEPVDLAVFSR LKTRDQEWYFY SALDKKYNGARMNRATNRGYWKATGKDREIR : 120

NAC050 121 : RDIQLLLGMKKTLLVFHSGRAPDGLR TNWVMHEYRLVEYETETNGSLLLQDAYVLCRVFHKN : 180
NAC052 121 : RDIQLLLGMKKTLLVFHSGRAPDGLR TNWVMHEYRLVEYETETKNGSLVQDAYVLCRVFHKN : 180

NAC050 181 : IGPPSGNRYAPFMEEEWALGGGALIPGIDVRVRVEALPQANGNNQMDQEMHSASKDLINI : 240
NAC052 181 : IGPPSGNRYAPFMEEEWADDEGALIPGIDVKLRLEPPPVANGNDQMQEIQSASKSLINI : 240

NAC050 241 : NELPRDATFMDIEENQONHHESA FKPOESNNHSCYEDEEDTLKREHAEEDERPP-SLIL : 299
NAC052 241 : NELPPRETAFLDIESDQONHHENDL KPEENNNNNYDENEDTLKREQMEERPPREVCVL : 300

NAC050 300 : NKEAPLPLLQYKRRRQNESNNNSSRNTQDHCSSSTTTVDNTTTLISSAAATNTAISAL : 359
NAC052 301 : NKEAPLPLLQYKRRRQSESNNNSSRNTQDHCSSSTTTVDNTTTLISS-AAATNTAISAL : 359

NAC050 360 : LEFSLMGISDKKENQC-----KEETSPPSFIASPEEKVNDLQKEVHQMSVERETFKLEM : 413
NAC052 360 : LEFSLMGISDKKKEKQOPLRPHKEPLPPQTPLASPEEKVNDLQKEVHQMSVERETFKLEM : 419

NAC050 414 : MSAEAMISILQSRIDALRQENEELKKNNASGQAS : 447
NAC052 420 : MSAEAMISILQSRIDALRQENEELKKNNA NGC-- : 451
```

Fig S4. Sequence alignment shows that NAC050 and NAC052 share 88% identity of their protein sequences.
