# Supplementary material
Source: PubMed Central journal article supplement (PMC4851312)
Supplement: celldisc20153-s7.pdf [file celldisc20153-s7.pdf]

**Fig. S5**

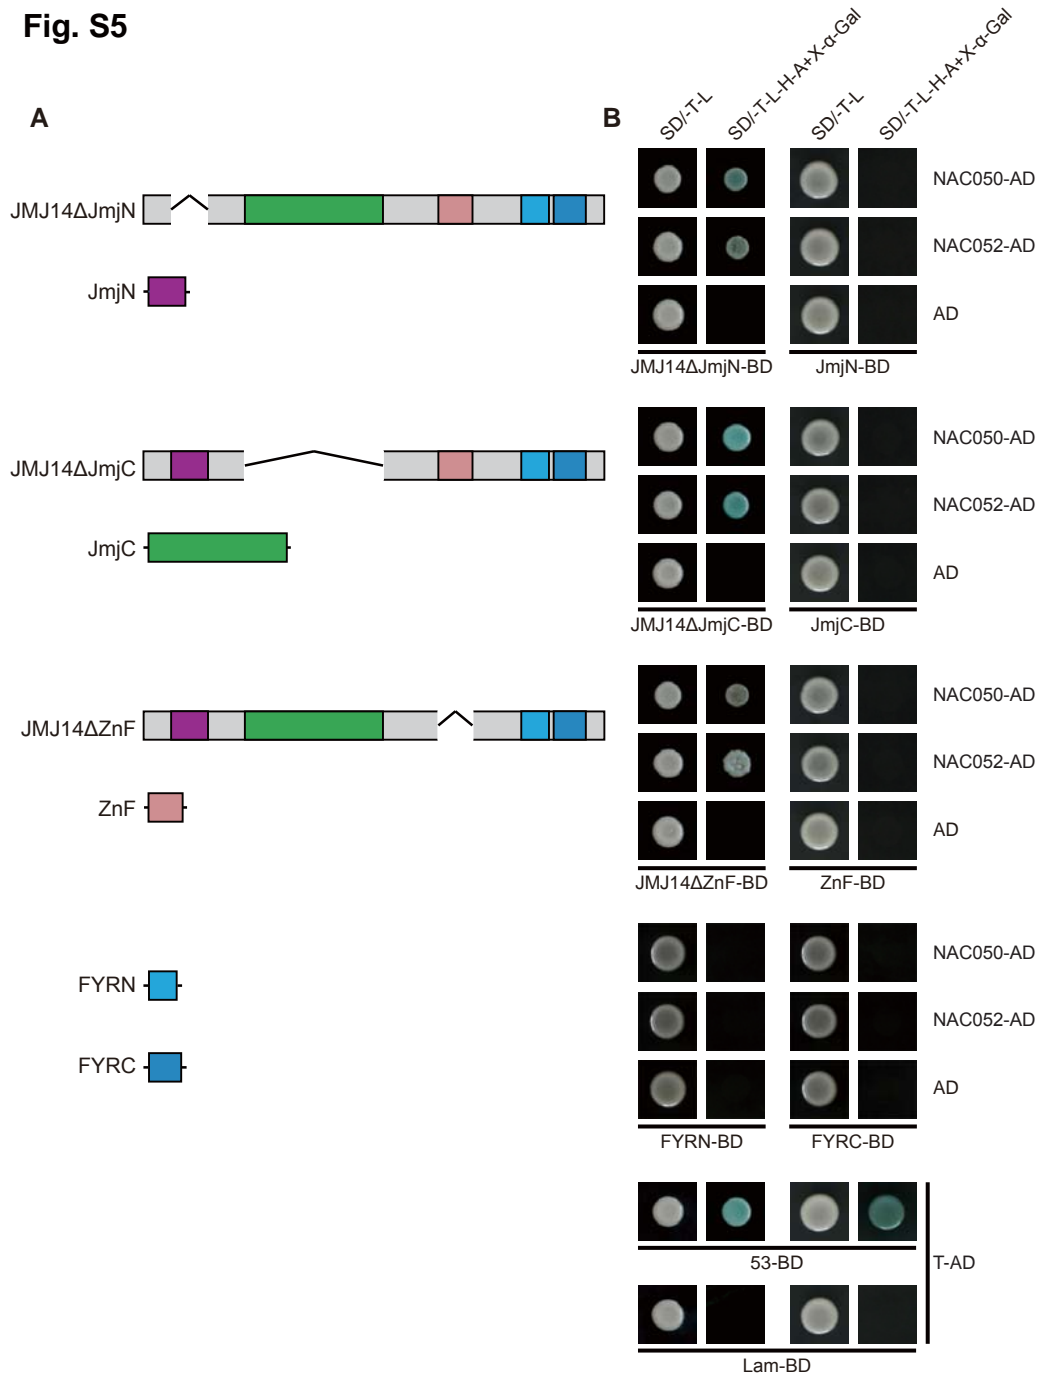

**Fig. S5.** The JmjN, JmjC, ZnF, FYRN or FYRC domain of JMJ14 do not interact with NAC050 and NAC052 in yeast. (A) The schematic representation of constructs used for yeast two hybrids. (B) Deletion of JmjN, JmjC or ZnF domain has no or very little effect on the interaction between JMJ14 and NAC050/NAC052. The JmjN, JmjC, ZnF, FYRN or FYRC domain alone does not interact with NAC050/NAC052.
