# Supplementary material
Source: PubMed Central journal article supplement (PMC4851312)
Supplement: celldisc20153-s8.pdf [file celldisc20153-s8.pdf]

**Fig.S6**

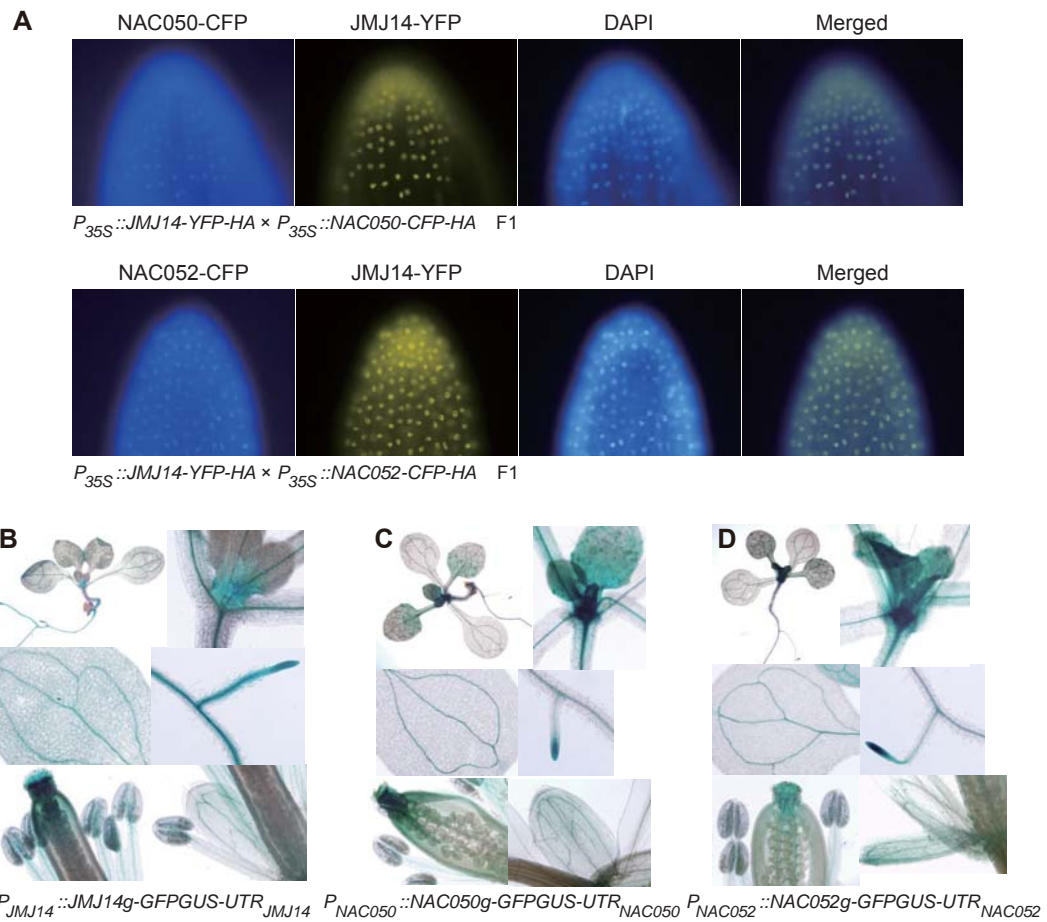

**Fig. S6.** JMJ14 and NAC050/052 colocalize in subcellular and tissue level. (A) JMJ14, NAC050 and NAC052 localize in nuclei. (B-D) *JMJ14*, *NAC050* and *NAC052* express in same tissues including meristem, vascular tissue, and stigma.
