# Supplementary material
Source: PubMed Central journal article supplement (PMC4851312)
Supplement: celldisc20153-s9.pdf [file celldisc20153-s9.pdf]

**Fig. S7**

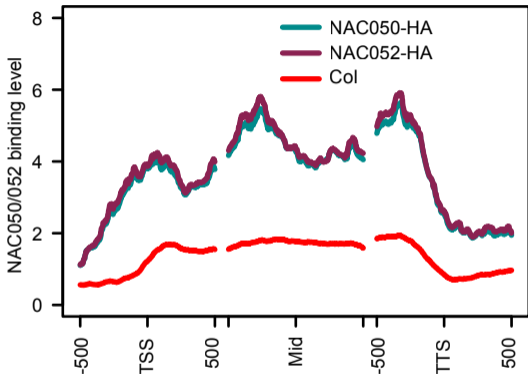

**Fig. S7.** The binding of NAC050 and NAC052 to their direct target genes in NAC050-HA, NAC052-HA and Col plants. The tag counts were normalized in each bin according to the total number of reads. NAC050-HA and NAC052-HA indicates the  $P_{NAC050}::NAC050-HA$  *nac050-1* and  $P_{NAC052}::NAC052-HA$  *nac052-2* transgenic lines respectively.
