# Supplementary material
Source: PubMed Central journal article supplement (PMC4851312)
Supplement: celldisc20153-s10.pdf [file celldisc20153-s10.pdf]

# Fig.S8

## A

### Biological processes

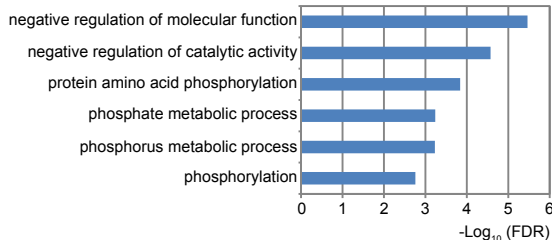

### Molecular functions

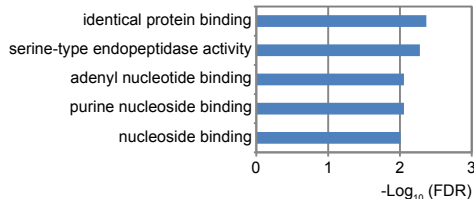

## B

### Biological processes

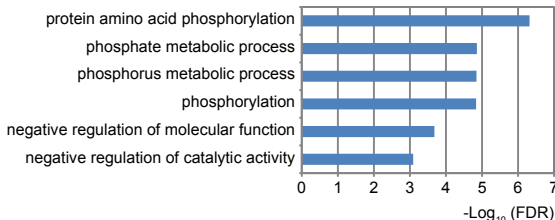

### Molecular functions

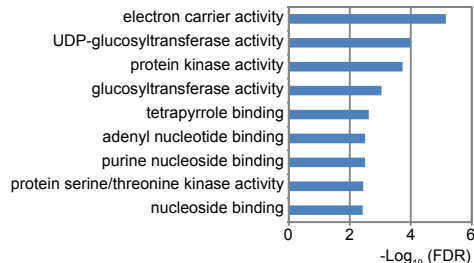

## C

### Biological processes

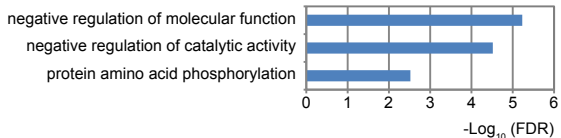

### Molecular functions

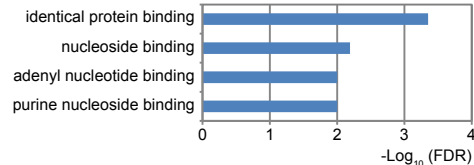

**Fig. S8.** Significantly enriched biological processes and molecular functions identified by Gene Ontology (GO) analysis of the common target genes of JM14, NAC050 and NAC052 (A), the target genes of JM14 (B) and the common target genes of NAC050 and NAC052 (C) (FDR < 0.01).
