# Supplementary material
Source: PubMed Central journal article supplement (PMC4851312)
Supplement: celldisc20153-s12.pdf [file celldisc20153-s12.pdf]

# Fig. S10

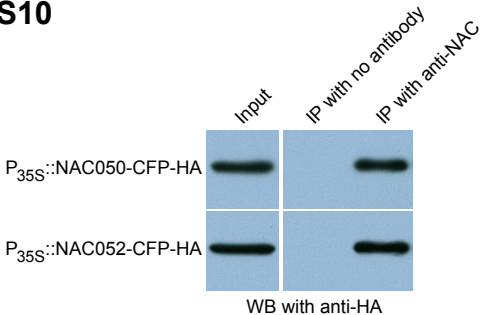

**Fig. S10.** The identification of the NAC antibody by immunoprecipitation using transgenic plants.
